# Supplementary material
Source: PubMed Central journal article supplement (PMC5744706)

# Suppl. Fig. 1

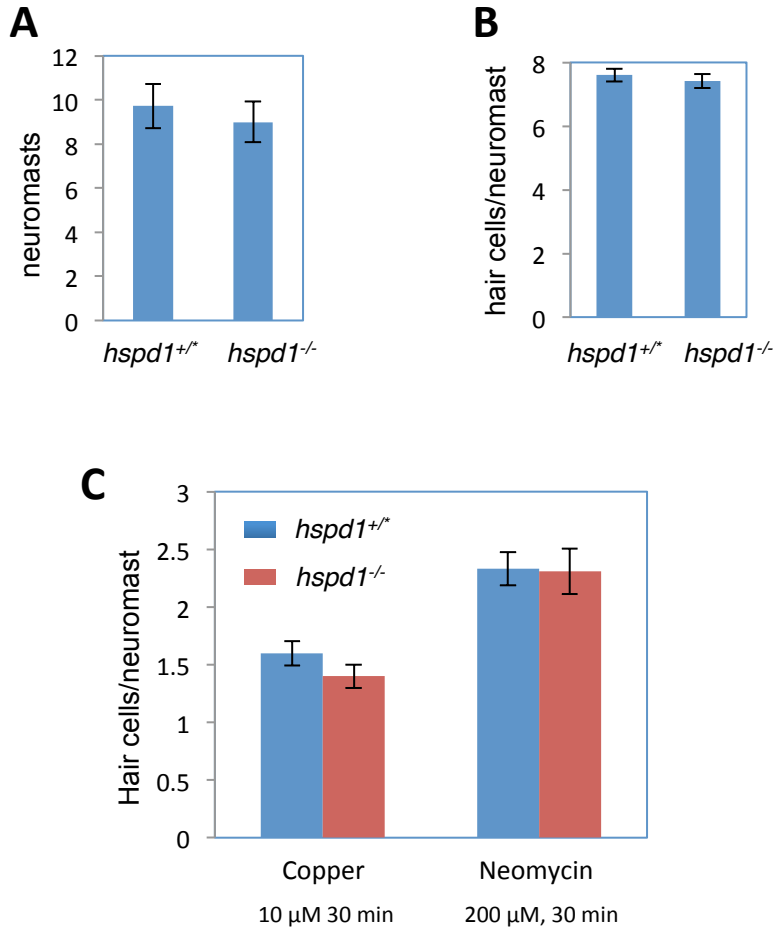

# Suppl. Fig. 2

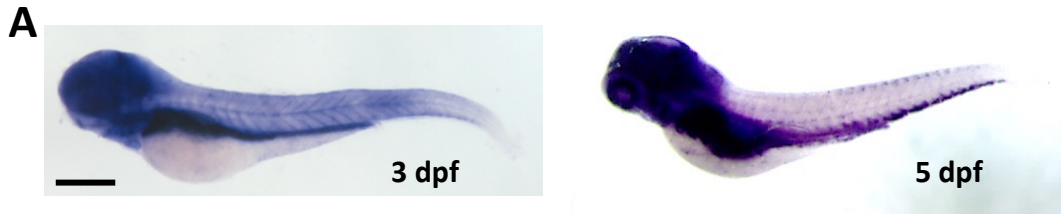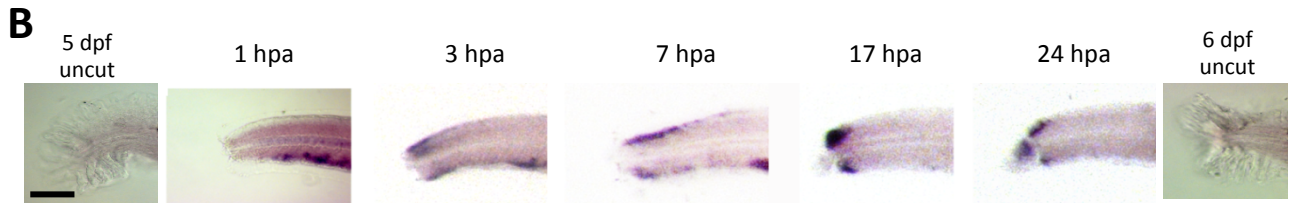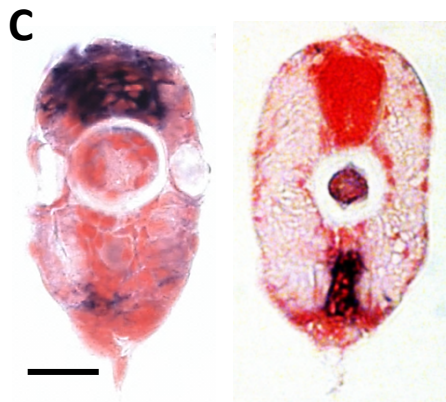

# Suppl. Fig. 3

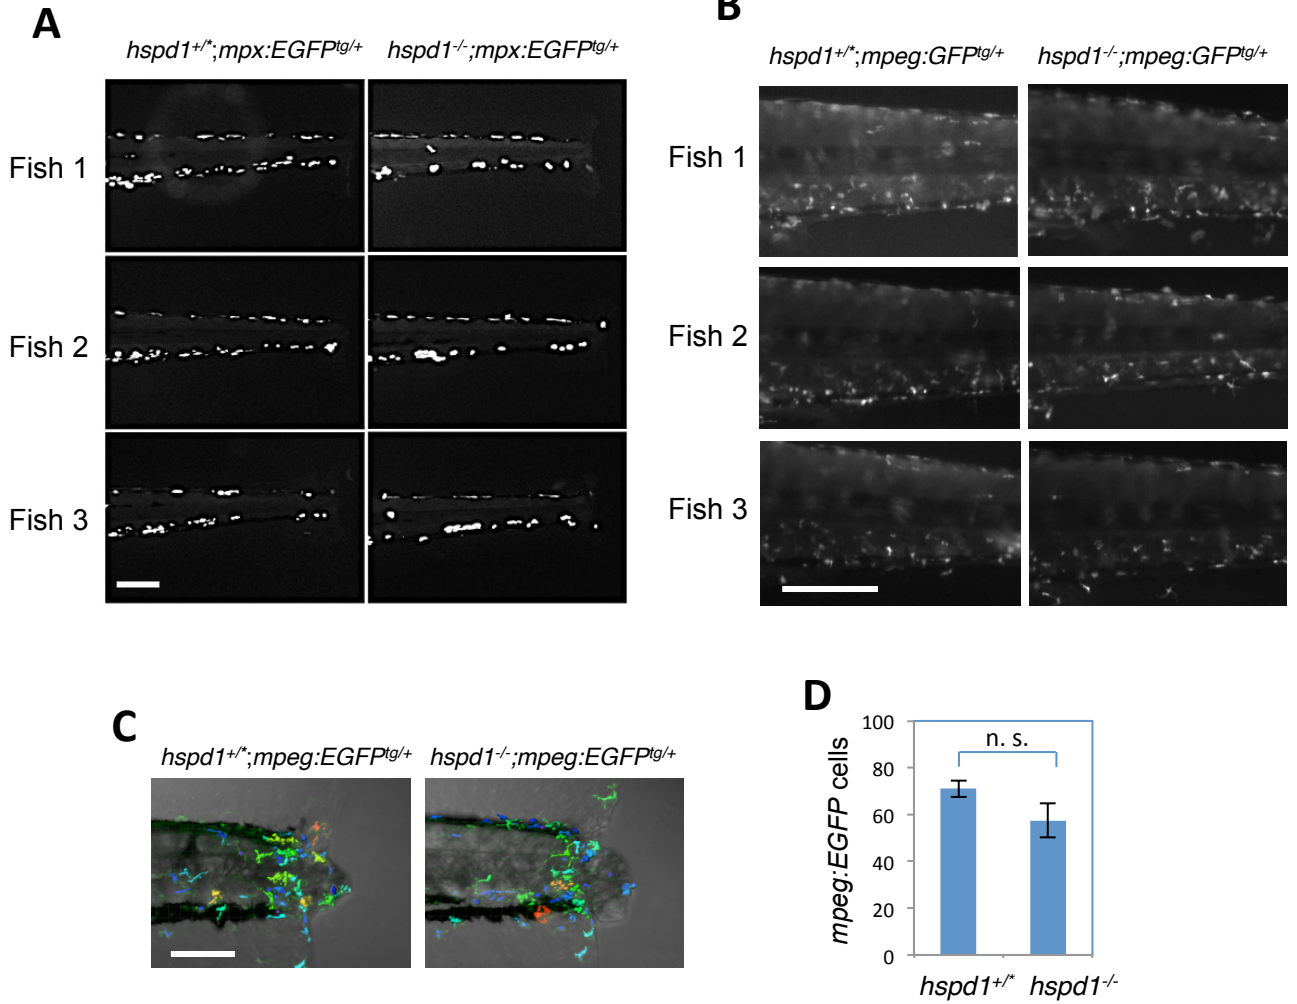

# Suppl. Fig. 4

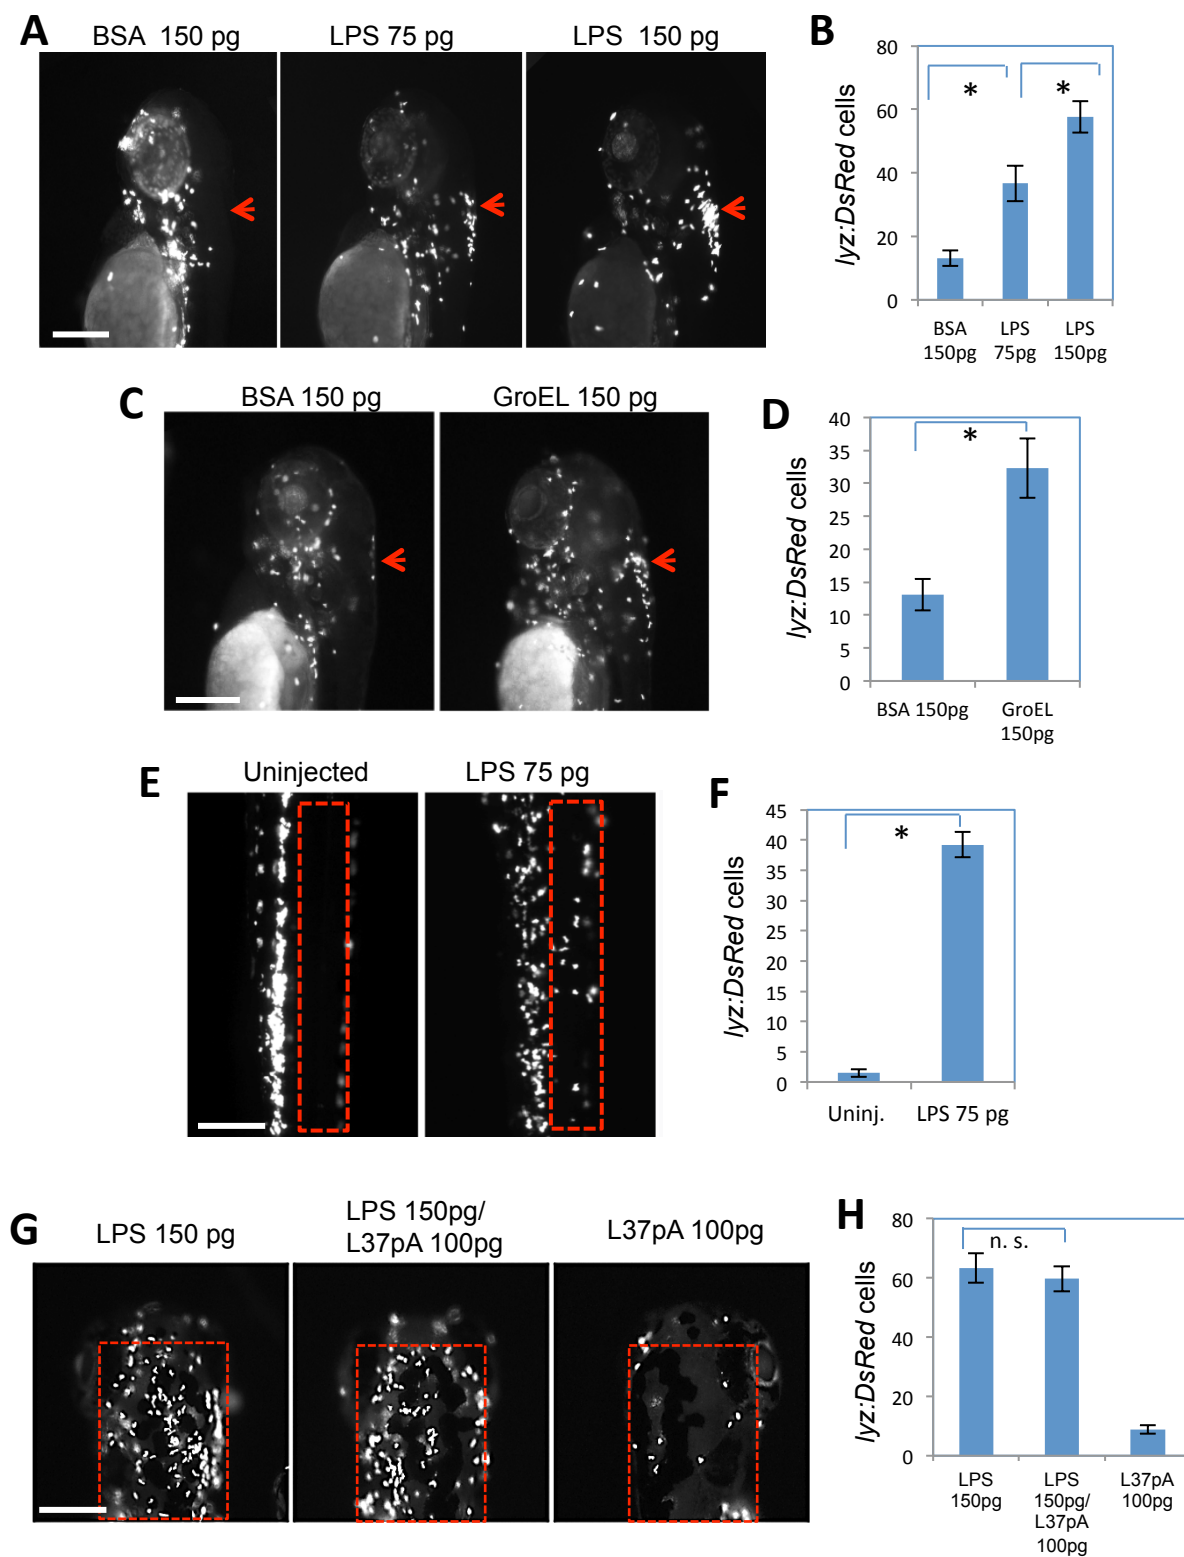

# Suppl. Fig. 5

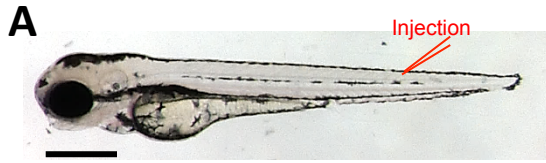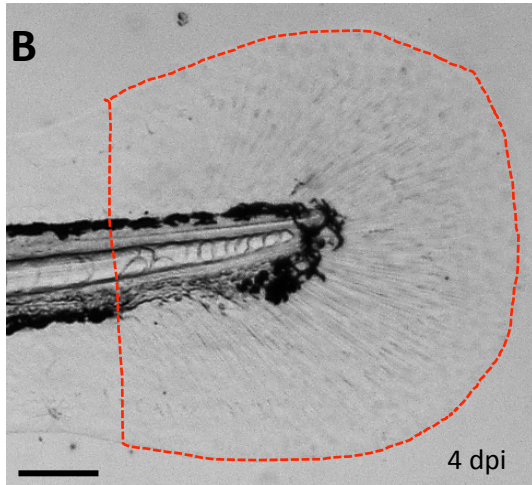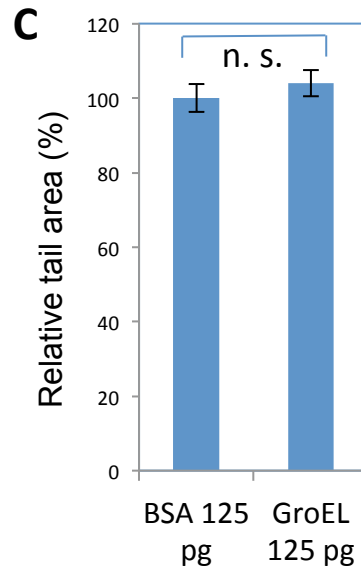

# Suppl. Fig. 6

## A

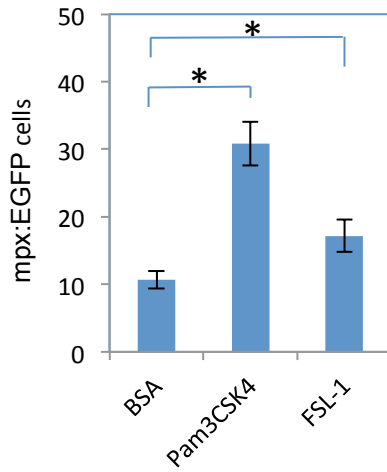

## B

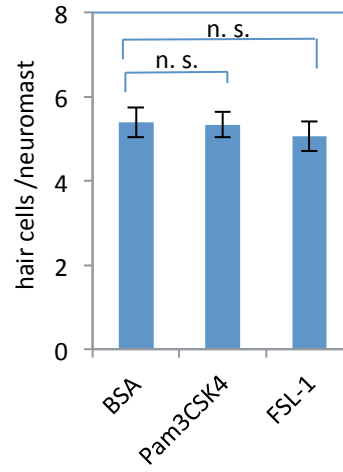

Suppl. Fig. 7

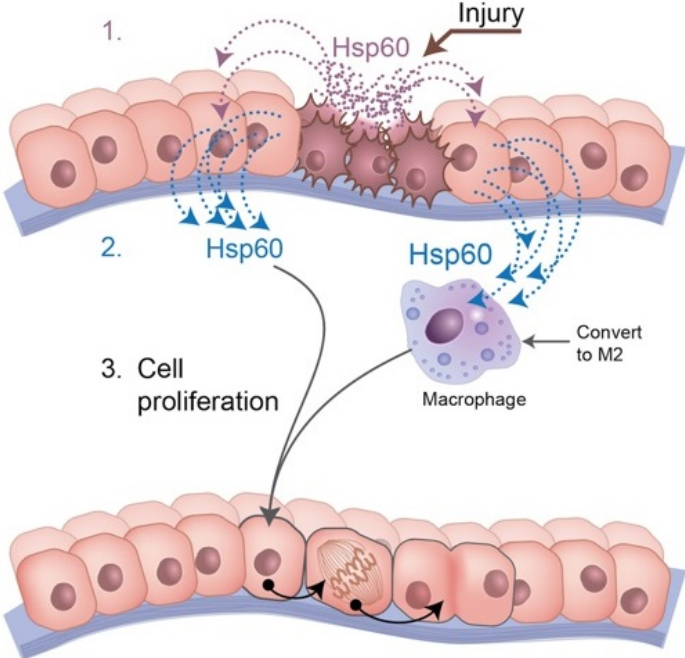

Supplement: npjregenmed201613-s1.pdf [file npjregenmed201613-s1.pdf]
